# Supplementary material for: Biodegradable and biocompatible spherical dendrimer nanoparticles with a gallic acid shell and a double-acting strong antioxidant activity as potential device to fight diseases from “oxidative stress”
Source: Springer Nature journal article supplement (doi:10.1007/s13346-019-00681-8), 2019-10-18
Supplement: MOESM1 [file 13346_2019_681_MOESM1_ESM.pdf]

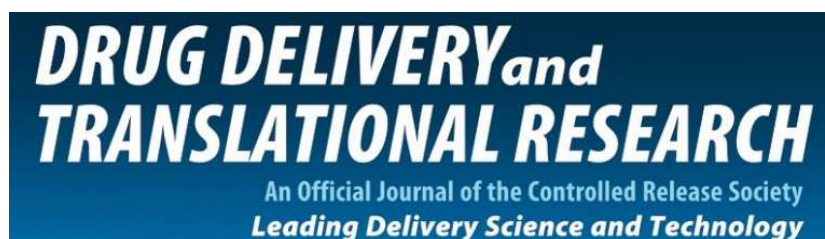

## Supporting Information

**Biodegradable and biocompatible spherical dendrimer nanoparticles with a gallic acid shell and a double-acting strong antioxidant activity as potential device to fight diseases from «oxidative stress»**

Silvana Alfei\*, Silvia Catena and Federica Turrini

*Department of Pharmacy, University of Genoa. Viale Cembrano, 4 I-16148 GENOA, ITALY*

\*Corresponding Author: Prof. Silvana Alfei  
Department of Pharmacy, University of Genoa  
Phone number: +39-010-3532296  
Fax number: +39-010-3532684  
Email: [alfei@difar.unige.it](mailto:alfei@difar.unige.it)  
ORCID: 0000-0002-4630-4371

## Table of Contents

Graphical Abstract for ESM

Figure S1: Structure of dendrons D4BnA, D4BnOH and D5BnA

Section S1: Table S1

Synthetic procedures for preparing dendrimers **3** and **4**

Section S2: Synthetic procedures for preparing compounds **5**, **6** and **7**

Section S3: Synthetic procedures for preparing GA-dendrimer (**9**) via dendrimer **8**

*FeCl<sub>3</sub> essay for phenols recognition for qualitative evaluation of GA-dendrimer (**9**) (Fig. S3.1)*

Section S4: Characterization of compounds **3-7** and GA-dendrimer (**9**)

*Table S4.1: Molecular Weight (MW) and significant physicochemical data of isolated compounds*

Section S5: Radical Scavenging Activity (RSA %) of GA-dendrimer (**9**)

*Fig. S5.1: RSA % curves versus  $\mu\text{g/mL}$  (a),  $\mu\text{mol/mL}$  (b) and mM concentrations (c)*

*Table S5.1: IC<sub>50</sub> values determined by us (GA-dendrimer (**9**), GA, AA and Trolox) or reported (a tocopherol) versus  $\mu\text{g/mL}$ ,  $\mu\text{mol/mL}$  and mM concentrations*

*In vitro investigation of GA-dendrimer (**9**) cytotoxicity by cell (%) viability evaluation*

*Fig. S5.2: Cell viability (%) graph*

Section S6: Qualitative evaluation of Pig Liver Esterase Hydrolyzed Product (PLEHP) **10**

*FeCl<sub>3</sub> essay for phenols recognition (Fig. S6.1)*

*Thin Layer Chromatography (TLC) (Fig. S6.2)*

*Characterization data (m.p., FT-IR and NMR spectra peaks list and*

*Elemental Analysis results of a sample of **10** recrystallized from ethanol (**10c**)*

*Copies of NMR spectra of **10c** versus those ones of commercial GA (Fig. S6.3)*

Section S7: Copies of FT-IR and NMR spectra of compounds **3-8** and of GA-dendrimer (**9**) (Fig. S7.1-S7.21)

References

Graphical Abstract for ESM

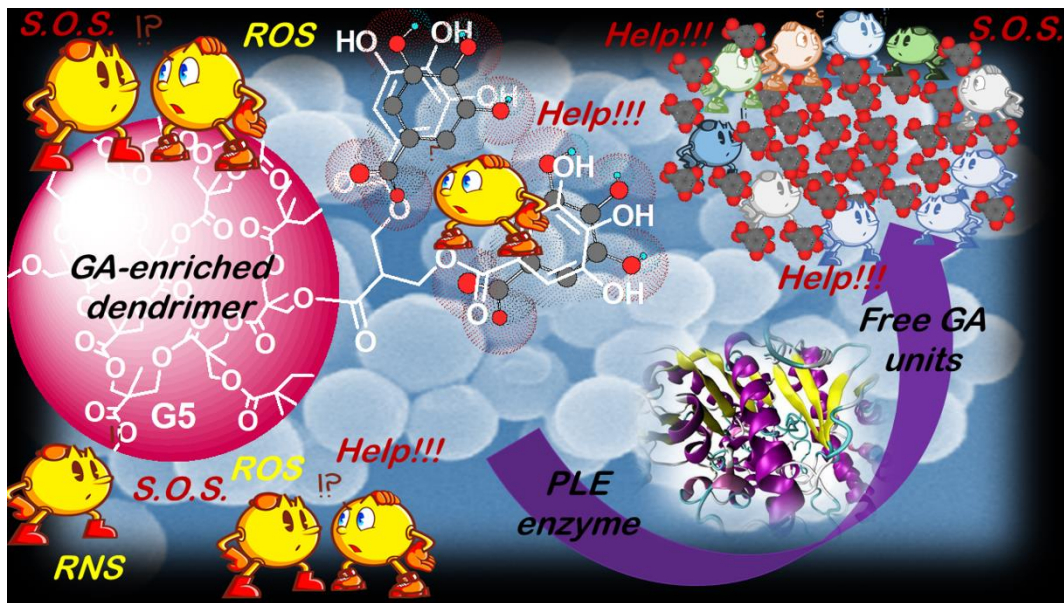

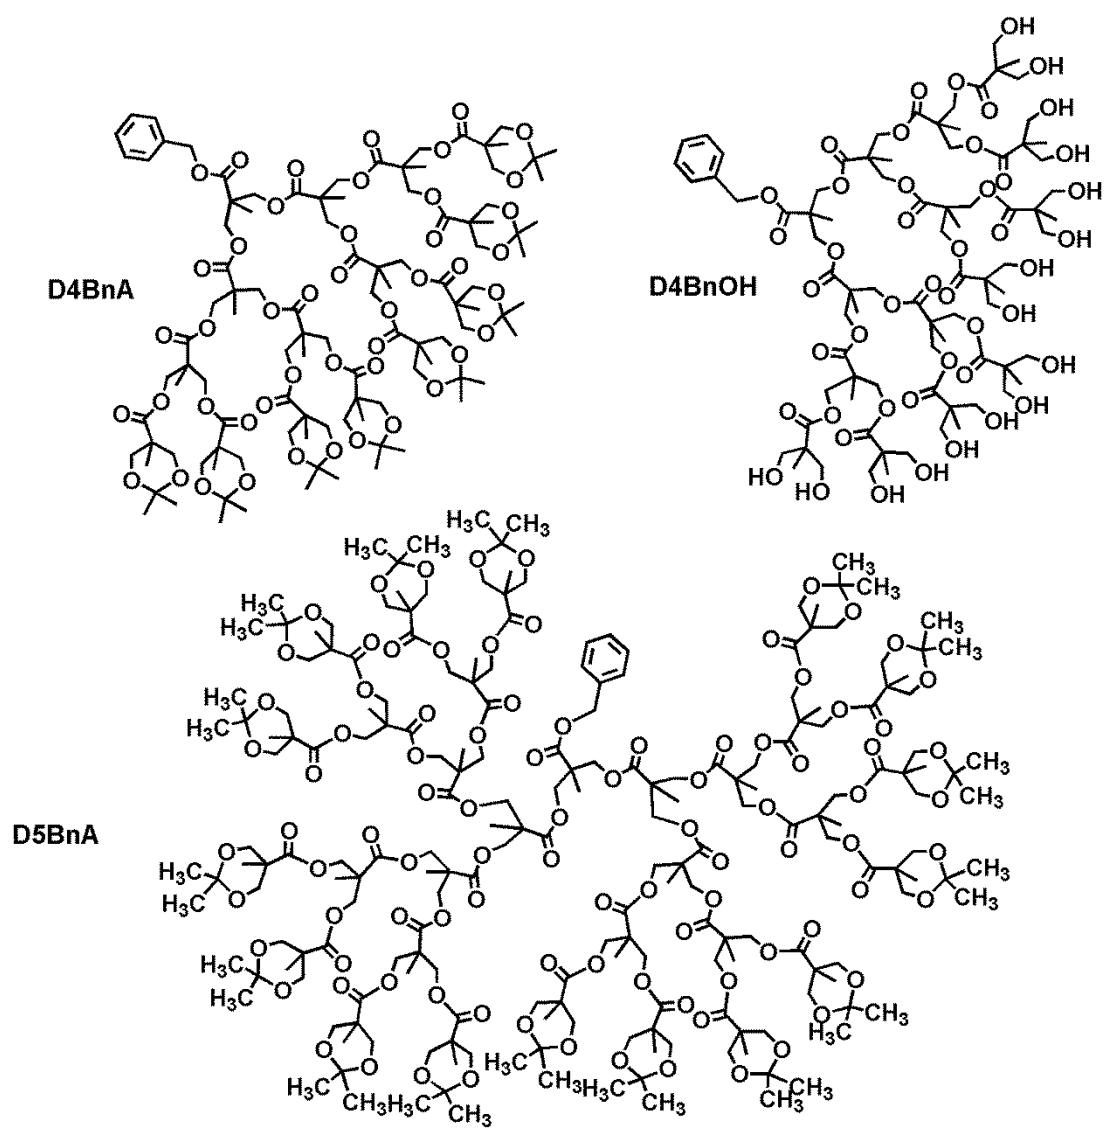

**Fig. S1** Structure of dendrons D4BnA, D4BnOH and D5BnA

## Section S1

**Table S1** Experimental data for the preparation of compounds **3-9**

| Entry<br>(g; mmol)       | Reagents<br>(mg; mmol) <sup>a</sup>                                                  | Solvents (mL)                                   | Time<br>T (°C) | Product<br>(g; mmol; %)                                 |
|--------------------------|--------------------------------------------------------------------------------------|-------------------------------------------------|----------------|---------------------------------------------------------|
| <b>2</b><br>2.64; 0.600  | DCC <sup>b</sup> 145.4; 0.70<br>DPTS <sup>c</sup> 124.4; 0.42<br>Diol 21.4; 0.28     | DCM <sup>d</sup> 11                             | 24h; r.t.      | <b>3</b><br>2.34; 0.27; 98.0                            |
| <b>3</b><br>2.34; 0.270  | Resins H <sup>+</sup> 500                                                            | MeOH 22                                         | 24h<br>r.t.    | <b>4</b><br>1.94; 0.267; 99.0                           |
| <b>1</b><br>398.7; 2.34  | TBDMSCl 1.98; 13.1<br>Imidazole 1.60; 23.4                                           | DMF <sup>e</sup> 6                              | 19h<br>r.t.    | <b>5</b><br>1.35 <sup>f</sup> ; 2.15; 91.9 <sup>f</sup> |
| <b>5</b><br>1.20; 1.91   | Acetic Acid 36 mL<br>H <sub>2</sub> O 12 mL                                          | THF <sup>g</sup> 35                             | 24h<br>r.t.    | <b>6</b><br>0.94; 1.89; 99.0                            |
| <b>6</b><br>0.93; 1.81   | SOCl <sub>2</sub><br>861.3; 7.24; 526.1 μL                                           | DCM <sup>d</sup> 7.2<br>DMF <sup>e,h</sup> 3ggt | 2h; r.t.       | <b>7</b><br>0.96; 1.81; 100.0                           |
| <b>4</b><br>159.3; 0.022 | <b>7</b> 928.2; 1.75<br>DMAP <sup>i</sup> 2.7; 0.022<br>TEA <sup>l</sup> 207.4; 2.05 | DCM <sup>d</sup> 5                              | 24h; r.t.      | <b>8</b><br>0.82 <sup>m</sup> ; 0.02; 95.5 <sup>m</sup> |
| <b>8</b><br>1.00; 0.0256 | Acetyl Chloride<br>1540; 19.7; 1.4 mL                                                | MeOH 10<br>EtOH 10                              | 5h; r.t.       | <b>9</b><br>0.43; 0.025; 97.6                           |

<sup>a</sup>If the unit of measurement is not specified. <sup>b</sup>Dicyclohexylcarbodiimide. <sup>c</sup>4-(Dimethylamino)pyridinium 4-toluene-sulfonate. <sup>d</sup>Dichloromethane. <sup>e</sup>*N,N*-Dimethylformamide. <sup>f</sup>Weight, mmol and yield have been calculated considering the impurities. <sup>g</sup>Tetrahydrofuran. <sup>h</sup>Catalyst; <sup>i</sup>*N,N*-dimethylaminopyridine. <sup>l</sup>*N,N,N*-Triethylamine. <sup>m</sup>Not purified product.

### Synthesis of dendrimer **3**

A solution made of a mixture of dendrimer **2** (2.64 g, 0.6199 mmol), 1, 3-propanediol (0.0214 g, 0.2818 mmol, 20.4 μl) and DPTS (0.1244 g, 0.4227 mmol) in CH<sub>2</sub>Cl<sub>2</sub> (8 ml) was treated with dicyclohexylcarbodiimide (DCC) (0.1454 g, 0.7045 mmol) dissolved in DCM (3 ml) at room temperature under N<sub>2</sub> and magnetic stirring for 24 h. The precipitated dicyclohexylurea (DCU) was removed by filtration and washed with CH<sub>2</sub>Cl<sub>2</sub>. Filtrate and washings were combined, concentrated at reduced pressure and taken with ethyl acetate (EtOAc) to make precipitate DPTS which was filtered and washed with EtOAc. The solvent was removed at reduced pressure to give the crude dendrimer **3** (2.78 g) which was submitted to a careful column chromatography to eliminate traces N-acylureic adduct of **2** highlighted by IR analysis and performed as follows. Dendrimer **3** was dissolved in the minimum quantity of a mixture petroleum ether/EtOAc=1:1 and passed through a short silica gel column (h=20 cm, ø=2 cm) using the same mixture of solvents (100 ml) collecting 1 mL fractions up to disappearance of IR bands at 2118 cm<sup>-1</sup> (DCC) and at 1648, 1527 cm<sup>-1</sup> (*N*-acylureic adduct of **2**). The chromatography was developed with petroleum ether/EtOAc=2:3 (100 ml) and completed with the mixture 1:4 (100 ml) and EtOAc 100% (200 ml) collected as a single fraction. The removal of the solvent at reduced pressure afforded **3** as glassy off-white solid which was brought to constant weight under vacuum (2.34 g, 0.2700 mmol, 98%).

### Synthesis of dendrimer **4**

A solution of **3** (2.34 g, 0.2700 mmol) in MeOH (22 ml) was treated with four spatula tips of acid resin Dowex 50 WX2-200 at room temperature with magnetic stirring for 24 h.

The resins were removed by filtration and washed with fresh MeOH.

Filtrate and washings were combined, concentrated at reduced pressure to give a pink glassy solid which was left under magnetic stirring overnight in excess of dry Et<sub>2</sub>O, filtered to give **4** as a pink hygroscopic solid (2.40 g) which was further purified by dissolution in H<sub>2</sub>O (80 ml), centrifuged to remove insoluble residues and freeze-dried to obtain **4** as fluffy highly hygroscopic white solid (1.94 g, 0.270, 99 % isolated yield) which was stored in a dryer on P<sub>2</sub>O<sub>5</sub>.

## Section S2

### Synthesis of *tert*-Butyldimethylsilyl 3,4,5-tri[(*tert*-butyldimethylsilyl)oxy]benzoate (**5**) [1]

Commercial Gallic Acid (GA) **1** (0.3987 g, 2.34 mmol), imidazole (10 equiv., 1.60 g, 23.40 mmol) and recently bought TBDMSCl (5.6 equiv., 1.98 g, 13.10 mmol) were dissolved in DMF (6 mL) at room temperature under N<sub>2</sub> and maintained

under magnetic stirring overnight. The reaction was stopped when the GA spot was no longer found in TLC (cyclohexane/EtOAc 4/1). Rf. GA = 0; Rf. **5** = 0.84. The suspension was diluted with Et<sub>2</sub>O and the organic phase was washed with water (3 x 16 mL). Once separated from aqueous phase, the organic one was dried on MgSO<sub>4</sub>. After solvent removal **5** was obtained as sticky colourless resin (1.35 g, 2.15 mmol, 91.9 %, net of traces of impurities found with NMR analysis).

#### *Synthesis of 3,4,5-tri[(tert-butyldimethylsilyl)oxy]benzoic acid (6) [1]*

Compound **5** (1.20 g, 1.91 mmol) was dissolved in 35 ml of THF at room temperature. A 3:1 mixture of AcOH-H<sub>2</sub>O (48 ml) was then added to the solution and the mixture was stirred at room temperature for 24 hours. The reaction was stopped when the **5** spot was no longer found in TLC (cyclohexane/EtOAc 4/1). The reaction mixture was poured into ice-cold H<sub>2</sub>O (80 ml) and the product was extracted with EtOAc (3 x 40 ml), washed with brine (2 x 40 ml), dried over MgSO<sub>4</sub> and concentrated in vacuo to give crude **6** as white solid smelling of acetic acid. It was then recrystallized from MeOH obtaining in two successive precipitates the purified **6** as odorless white crystals (0.9400 g, 1.89 mmol, 99.0 % isolated yield).

#### *Synthesis of 3,4,5-tri[(tert-butyldimethylsilyl)oxy]benzoyl chloride (7)*

Compound **6** (0.9300 g, 1.81 mmol) was dissolved in DCM (7.2 ml), cooled to 0°C and added with SOCl<sub>2</sub> (0.8613 g, 7.24 mmol, 0.5211 ml), catalytic DMF (3 drops) and allowed to reach room temperature. The reaction was monitored by FTIR analysis and was stirred until the disappearance of C=OOH peak at 1680 cm<sup>-1</sup> with concomitant appearance of a peak at 1759 cm<sup>-1</sup> (C=OCl). After 2 h at room temperature, the solvent was removed obtaining a waxy brown solid with a pungent smell. It was washed first with toluene and then with *n*-hexane, eliminating from time to time insoluble dark pitches and obtaining **7** as a pale yellow waxy solid. Its level of purity was early tested by TLC (cyclohexane/EtOAc 10/1) and, since it was very good, **7** was used in the subsequent reaction without further purification (0.9600, 1.81 mmol, 100% yield).

### **Section S3**

#### *Synthesis of GA-dendrimer 9 via dendrimer TBDMS-GA-dendrimer 8*

##### *Esterification reaction of dendrimer 4 with 7*

A solution of dendrimer **4** (0.1593 g, 0.0219 mmol), DMAP (0.0027 g, 0.0219 mmol) and TEA (0.2074 g, 2.05 mmol, 0.2860 ml) in DCM (3 ml) cooled to 0° C, was dropwise added with chloride acid **7** (0.9282 g, 1.75 mmol) in turn dissolved in DCM (2 ml). Once reached the room temperature the reaction mixture was stirred overnight. A TLC (cyclohexane/EtOAc 10/1) was performed to evaluate the reaction status. Only traces of unreact **7** were detected while the FTIR spectrum of a small hydrolyzed sample showed both the peak of the C=OO group (around 1733 cm<sup>-1</sup>) of **4** scaffold and the C=OO peak of the conjugate ester type (1723 cm<sup>-1</sup>) indicating the occurrence of peripheral functionalization. At the same time the band relative to the OH groups of **4** was strongly diminished. The reaction mixture was hydrolyzed with 10% KHSO<sub>4</sub> (10 ml), extracted with DCM (3 x 15 ml) and dried over MgSO<sub>4</sub>. After evaporation of the solvent, the dendrimer functionalized with protected GA **8** was obtained as an orange glassy solid (0.8179, 0.021 mmol, 95.5 yield). Compound **8** was subjected to deprotection reaction without further purification.

##### *Removal of TBDMS protecting groups from 8: synthesis of GA-loaded dendrimer 9*

As previously reported [2,3], a solution of crude dendrimer **8** (1.00 g, 0.0256 mmol) in MeOH/EtOH 1/1 (20 ml) cooled to 0°C, was treated with a strong excess of acetyl chloride (4 eq./TBDMS group, 1.54 g, 19.7 mmol, 1.4 ml) and was stirred for 5 h at r.t. The reaction was stopped and the solvent removed. The obtained residue was dissolved in EtOAc (40 ml) and the organic solution was washed with 15% NaOH (3 x 30 ml) to remove low molecular weight phenolic compounds (mainly unbound GA residue) and the organic phase was dried over MgSO<sub>4</sub>. Once removed the solvent, the dark glassy residue was taken up with EtOAc (q.s.), the neutral pH was lowered with HCl at pH = 2 observing a considerable solution clarification. The organic phase was washed with water and dried again. After removal of the solvent, **9** was obtained as a highly hygroscopic brownish glassy solid carefully stored in a dryer on P<sub>2</sub>O<sub>5</sub> and under vacuum (0.4252 g, 0.0250, 97.6% yield). As early qualitative investigation, the FeCl<sub>3</sub> assay for phenols recognition was performed to confirm the presence of free phenol groups.

## FeCl<sub>3</sub> essay

Approximately 1 ml of 5% ethanol solution of **9** pale yellow colored was placed in a test tube and was treated with 2-3 drops of 5% FeCl<sub>3</sub> prepared fresh. A strong green coloring indicating the presence of phenolic groups was observed (Fig. S 3.1).

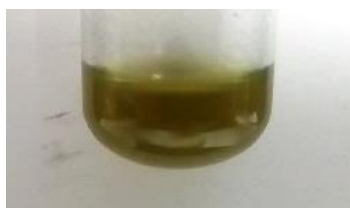

**Fig. S3.1** Green coloring obtained in the FeCl<sub>3</sub> test performed on GA-dendrimer (**9**) solution

## Section 4

### Characterization data of compounds 3-8 and of GA-dendrimer (**9**)

#### FT-IR, NMR spectra data and Elemental analysis results of compounds 3-8 and of GA-dendrimer (**9**)

**Dendrimer 3.** FTIR (KBr, cm<sup>-1</sup>): 2992, 2939, 2878 (CH<sub>3</sub> and CH<sub>2</sub>), 1748 (C=O). <sup>1</sup>H NMR (300 MHz, CDCl<sub>3</sub>) δ (ppm): 1.12, 1.17, 1.26 (s signals, 186H, CH<sub>3</sub> of generations), 1.33 (s, 96H, CH<sub>3</sub> acetonide), 1.40 (s, 96H, CH<sub>3</sub> acetonide), CH<sub>2</sub> propandiol, probably overlapped, 3.60 (d, 64H, *J* = 11.8 Hz, CH<sub>2</sub>O acetonide), 3.71-3.91 (m, 4H, CH<sub>2</sub>O propandiol), 4.13 (d, 64H, *J* = 11.7 Hz, CH<sub>2</sub>O acetonide), 4.25-4.34 (m, 120H, CH<sub>2</sub>O generations). <sup>13</sup>C NMR (75.5 MHz, CDCl<sub>3</sub>) δ (ppm): 173.48, 171.80 (C=O), 98.12 (quaternary C of acetonide), 67.29, 65.95, 65.90, 64.83 (CH<sub>2</sub>O), 49.11, 46.82, 46.70 (quaternary C of three generations), 42.03 (quaternary C of fourth generation), 25.24 (CH<sub>3</sub> of acetonide), 22.00 (CH<sub>3</sub> of acetonide), 18.49, 17.68 (CH<sub>3</sub> of generation). Found: C, 57.05; H, 7.18. C<sub>409</sub>H<sub>637</sub>O<sub>188</sub> requires C, 57.41; H, 7.44%.

**Dendrimer 4.** FTIR (KBr, cm<sup>-1</sup>): 3433 (OH), 2933, 1733 (C=O). <sup>1</sup>H NMR (300 MHz, DMSO-*d*<sub>6</sub>) δ (ppm): 1.01, 1.16, 1.18, 1.23, 1.34 (five s signals, 186H, CH<sub>3</sub> of generations), 1.70 (m, 2H, CH<sub>2</sub> propandiol), 3.52 (dd, 128H, CH<sub>2</sub>OH), 3.56 (partially overlapped signal, 2H, CH<sub>2</sub>O propandiol), 3.98 (partially overlapped signal, 2H, CH<sub>2</sub>O propandiol), 4.08-4.18 (m, 120H, CH<sub>2</sub>O of four generations), 4.37 (br s, 64H, OH). <sup>13</sup>C NMR (75.5 MHz, DMSO-*d*<sub>6</sub>) δ (ppm): 173.94, 171.73 (C=O), 64.27, 63.55 (CH<sub>2</sub>O), 50.13 (quaternary C of fifth generation), 46.12 (other generation detectable quaternary C), 17.05, 16.61 (CH<sub>3</sub> of generations). Found: C, 51.71; H, 7.01. C<sub>313</sub>H<sub>504</sub>O<sub>188</sub> requires C, 51.67; H, 6.98%.

**tert-Butyldimethylsilyl 3,4,5-tri[(tert-butyldimethylsilyl)oxy]benzoate (**5**) [1].** TLC: R<sub>f</sub> = 0.84 (cyclohexane/EtOAc 4/1). FTIR (KBr, cm<sup>-1</sup>): 2933, 2861 (CH<sub>3</sub> and CH<sub>2</sub>), 1703 (C=O), 1258, 1092. <sup>1</sup>H NMR (300 MHz, CDCl<sub>3</sub>) δ (ppm): [0.017 and 0.10 (two s, CH<sub>3</sub>Si, impurities)], 0.14 (s, 6H), 0.24 (s, 12H), 0.36 (s, 6H), [0.87 and 0.92 (two s, CH<sub>3</sub> t-Buthyl, impurities)], 0.95 (s, 18H), 0.99 (s, 9H), 1.01 (s, 9H), 7.23 (s, 2H). <sup>13</sup>C NMR (75.5 MHz, CDCl<sub>3</sub>) δ (ppm): 166.31, 148.31, 143.18, 123.26, 115.95, 26.19, 26.12, [25.70 and 25.66 (impurities)], 25.60, 18.82, 18.48, [18.13 (impurity)], 17.70, [-2.94 (impurity)], -3.58, [-3.64 (impurity)], -3.89, -4.80. Found: C, 59.00; H, 10.02; Si, 12.78. C<sub>31</sub>H<sub>62</sub>O<sub>5</sub>Si<sub>4</sub> requires C, 59.39; H, 9.98; Si, 12.77%.

**3,4,5-tri[(tert-butyldimethylsilyl)oxy]benzoic acid (**6**) [1].** TLC: R<sub>f</sub> = 0.44 (cyclohexane/EtOAc 4/1). m.p. 237°C [lit.<sup>1</sup>: m.p. 230°C (MeOH)]. FTIR (KBr, cm<sup>-1</sup>): 3650-3100 (OH), 2933, 2900, 2861 (CH<sub>3</sub> and CH<sub>2</sub>), 1687 (C=OOH), 1259, 1086. <sup>1</sup>H NMR (300 MHz, CDCl<sub>3</sub>) δ (ppm): 0.15 (s, 6H), 0.25 (s, 12H), 0.96 (s, 18H), 1.00 (s, 9H), 7.29 (s, 2H); <sup>13</sup>C-NMR (75.5 MHz, CDCl<sub>3</sub>) δ (ppm): 172.01, 148.49, 144.07, 121.07, 116.12, 26.19, 26.11, 18.82, 18.51, -3.63, -3.88. Found: C, 58.58; H, 9.40; Si, 16.00. C<sub>25</sub>H<sub>48</sub>O<sub>5</sub>Si<sub>3</sub> requires C, 58.56; H, 9.44; Si, 16.38%.

**3,4,5-tri[(tert-butyldimethylsilyl)oxy]benzoyl chloride (**7**).** TLC: R<sub>f</sub> = 0.80 (cyclohexane/EtOAc 10/1). FTIR (KBr, cm<sup>-1</sup>): 2932, 2860 (CH<sub>3</sub> and CH<sub>2</sub>), 1759 (C=OCl). <sup>1</sup>H-NMR (300 MHz, CDCl<sub>3</sub>) δ (ppm): 0.15 (s, 6H), 0.26 (s, 12H), 0.96 (s, 9H), 0.99 (s, 18H), 7.32 (s, 2H). <sup>13</sup>C NMR (75.5 MHz, CDCl<sub>3</sub>) δ (ppm): 167.11, 148.76, 145.92, 124.65, 117.42, 26.14, 26.00, 18.86, 18.53, -3.67, -3.87. Found: C, 56.22; H, 9.05; Cl, 7.00; Si, 16.02. C<sub>25</sub>H<sub>47</sub>ClO<sub>4</sub>Si<sub>3</sub> requires C, 56.53; H, 8.93; Cl, 6.68; Si, 15.81%.

#### TBDMS-GA-loaded dendrimer **8**

Not purified product. TLC: R<sub>f</sub> = 0.70 (cyclohexane/EtOAc 10/1). FTIR (KBr, cm<sup>-1</sup>): 2958, 2932, 2897, 2860 (CH<sub>3</sub> and CH<sub>2</sub>), 1741 (C=O inner matrix), 1726 (peripheral conjugated C=OOGA), 1259, 1093.

### GA-loaded dendrimer 9

FTIR (KBr,  $\text{cm}^{-1}$ ): 2932, 2899, 2861 ( $\text{CH}_3$  and  $\text{CH}_2$  dendrimer matrix), 1741 ( $\text{C}=\text{O}$  inner matrix), 1726 (peripheral conjugated  $\text{C}=\text{OOGA}$ ).  $^1\text{H}$  NMR (300 MHz,  $\text{DMSO}-d_6$ ),  $\delta$  (ppm): 1.01, 1.16, 1.18, 1.23, 1.34 (five s signals, 186H,  $\text{CH}_3$  of generations), 1.70 (m, 2H,  $\text{CH}_2$  propandiol), 3.95 (m, 128H, GA esterified  $\text{CH}_2\text{O}$ ), 4.05-4.40 (m, 120H,  $\text{CH}_2\text{O}$  of four generations), 7.32 (s, 128H, GA phenyl  $\text{CH}=\text{}$ ), 8.00-10.00 (br s, GA phenols OH).  $^{13}\text{C}$  NMR (75.5 MHz,  $\text{DMSO}-d_6$ )  $\delta$  (ppm): 173.94, 171.73 ( $\text{C}=\text{O}$  of dendrimer scaffold), 167.11 ( $\text{C}=\text{O}$  of GA), 148.80, 145.94, 124.67 (quaternary C of phenyl), 117.41 ( $\text{CH}=\text{}$  of phenyl), 64.27, 63.55 ( $\text{CH}_2\text{O}$ ), 50.13 (quaternary C of fifth generation), 46.12 (other generation detectable quaternary C), 17.05, 16.61 ( $\text{CH}_3$  of generations). Found: C, 54.03; H, 4.89.  $\text{C}_{761}\text{H}_{760}\text{O}_{444}$  requires C, 53.72; H, 4.51%.

### Molecular Weight (MW) and Elemental analysis results of compounds 3-7 and of GA-dendrimer (9)

**Table S4.1** Elemental Analysis data and other physicochemical data of the isolated reported compounds

| Compound | Formula                                             | MW                    | Required (%) | Found (%) | Error (%) | Physical state                       |
|----------|-----------------------------------------------------|-----------------------|--------------|-----------|-----------|--------------------------------------|
| <b>3</b> | $\text{C}_{409}\text{H}_{632}\text{O}_{188}^a$      | 8557.28 <sup>a</sup>  | C 57.41      | C 57.05   | C 0.36    | Glassy<br>Off-white<br>solid         |
|          |                                                     |                       | H 7.44       | H 7.18    | H 0.26    |                                      |
| <b>4</b> | $\text{C}_{313}\text{H}_{504}\text{O}_{188}^a$      | 7275.24 <sup>a</sup>  | C 51.67      | C 51.71   | C 0.04    | Fluffy white<br>hygroscopic solid    |
|          |                                                     |                       | H 6.98       | H 7.01    | H 0.03    |                                      |
| <b>5</b> | $\text{C}_{31}\text{H}_{62}\text{O}_5\text{Si}_4$   | 626.37                | C 59.39      | C 59.00   | C 0.39    | Viscous resin                        |
|          |                                                     |                       | H 9.98       | H 10.02   | C 0.04    |                                      |
|          |                                                     |                       | Si 12.77     | Si 12.78  | H 0.01    |                                      |
| <b>6</b> | $\text{C}_{25}\text{H}_{48}\text{O}_5\text{Si}_3$   | 512.90                | C 58.56      | C 58.58   | C 0.02    | White crystals                       |
|          |                                                     |                       | H 9.44       | H 9.40    | H 0.04    |                                      |
|          |                                                     |                       | Si 16.38     | Si 16.00  | Si 0.38   |                                      |
| <b>7</b> | $\text{C}_{25}\text{H}_{47}\text{ClO}_4\text{Si}_3$ | 531.35                | C 56.53      | C 56.22   | C 0.31    | Pale yellow waxy<br>solid            |
|          |                                                     |                       | H 8.93       | H 9.05    | H 0.12    |                                      |
|          |                                                     |                       | Cl 6.68      | Cl 7.00   | Cl 0.32   |                                      |
| <b>9</b> | $\text{C}_{761}\text{H}_{760}\text{O}_{444}^a$      | 17010.02 <sup>a</sup> | Si 15.81     | Si 16.02  | Si 0.21   | Brownish glassy<br>hygroscopic solid |
|          |                                                     |                       | C 53.72      | C 54.03   | C 0.31    |                                      |
|          |                                                     |                       | H 4.51       | H 4.89    | H 0.38    |                                      |

<sup>a</sup>Estimated by  $^1\text{H}$  NMR spectra and confirmed by Elemental Analysis



## Section S5

### Radical Scavenging Activity (RSA %) of GA-dendrimer (9)

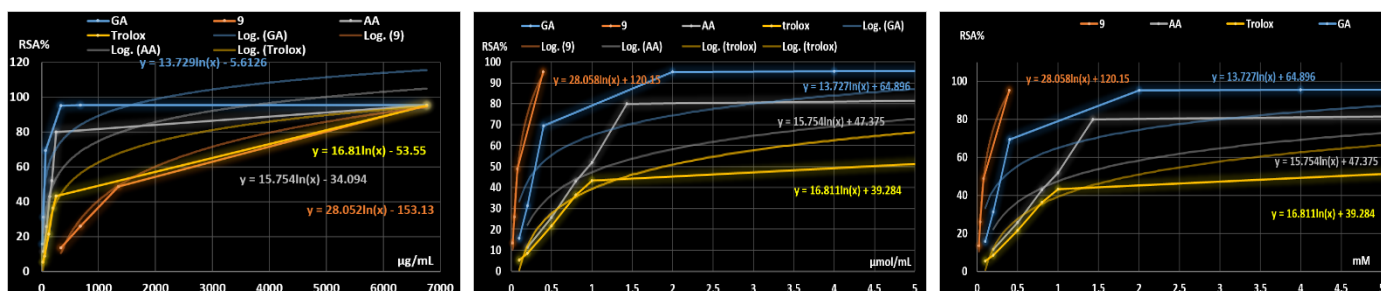

**Fig. S5.1** RSA (%) curves recorded at different **9**, GA, AA and Trolox concentrations in ethanol or water solution: concentrations were given in  $\mu\text{g/mL}$  (a),  $\mu\text{mol/mL}$  (b) mM (c). The corresponding exponential tendency curves and related equations used to derive the  $\text{IC}_{50}$  were also provided

**Table S5.1** Comparison between RSA (%) expressed as  $\text{IC}_{50}$  ( $\mu\text{g/mL}$ ,  $\mu\text{mol/mL}$ , mM), of **9**, GA, AA, Trolox and  $\alpha$ -Tocopherol [2].

| Entry (MW)                                   | $\text{IC}_{50}$ ( $\mu\text{g/mL}$ ) | $\text{IC}_{50}$ ( $\mu\text{mol/mL}$ ) <sup>a</sup> | $\text{IC}_{50}$ [mM] <sup>a</sup> |
|----------------------------------------------|---------------------------------------|------------------------------------------------------|------------------------------------|
| <b>9</b> <sup>b,c</sup> (17010.017)          | 1395.8                                | 0.0821                                               | 0.08                               |
| GA <sup>b,c</sup> (170.12)                   | 57.4                                  | 0.3378                                               | 0.34                               |
| AA <sup>b,d</sup> (176.12)                   | 208.1                                 | 1.1813                                               | 1.18                               |
| Trolox <sup>b,d</sup> (250.29)               | 473.4                                 | 1.8916                                               | 1.89                               |
| $\alpha$ -Tocopherol <sup>e</sup><br>(430.7) | 96.0                                  | 0.2230                                               | 0.22                               |

<sup>a</sup>Calculated from concentration expressed in  $\mu\text{g/mL}$ . <sup>b</sup>From DPPH test performed by us. <sup>c</sup>In ethanol. <sup>d</sup>In water. <sup>e</sup>Lit.[2]

### In vitro investigation of GA-dendrimer (9) cytotoxicity by cell (%) viability evaluation

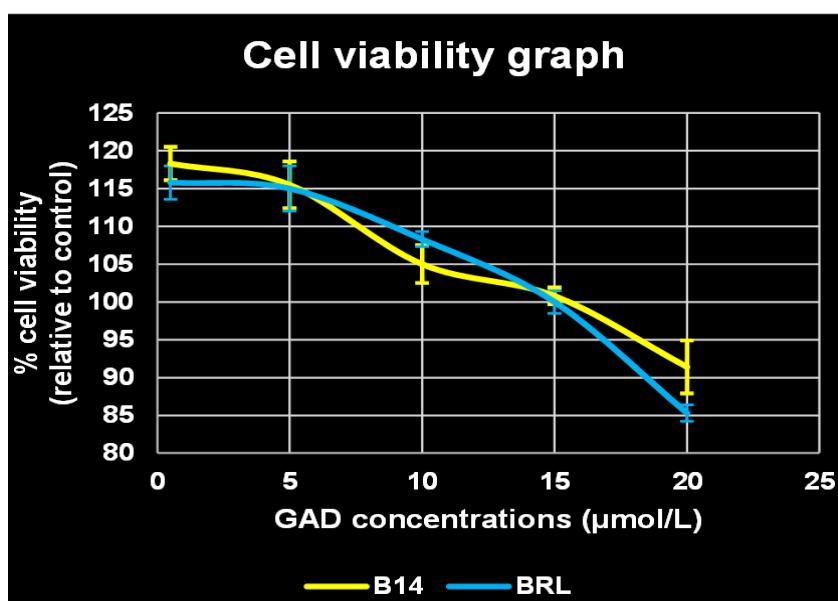

**Fig. S5.2** Cell viability (%) graph

## Section S6

### *Qualitative evaluation of Pig Liver Esterase hydrolyzed Product 10*

#### *FeCl<sub>3</sub> essay for phenols recognition*

As early investigation, crude **10** was essayed with FeCl<sub>3</sub> test commonly used for phenols identification. Approximately 1 ml of 5% ethanol solution of **10** yellowish colored was placed in a test tube and was treated with 2-3 drops of 5% FeCl<sub>3</sub> freshly prepared. A strong blue coloring was observed. Then a commercial GA sample was essayed in the same conditions. A blue coloring identical to that observed for **10** it has been seen again (Fig. S6.1).

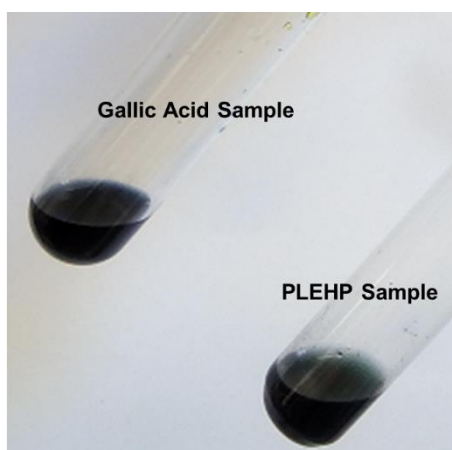

**Fig. S6.1** FeCl<sub>3</sub> test coloring obtained from **10** sample versus commercial standard of GA

#### *Thin Layer Chromatography (TLC)*

As other early investigation a TLC (petrol ether/EtOAc/MeOH 5/5/1) was performed. A solution of **10** dissolved in acetone (q. s.) was seeded on TLC plate together with a sample of commercial GA in turn dissolved in acetone. Fig. S6.2 shows the elution profile.

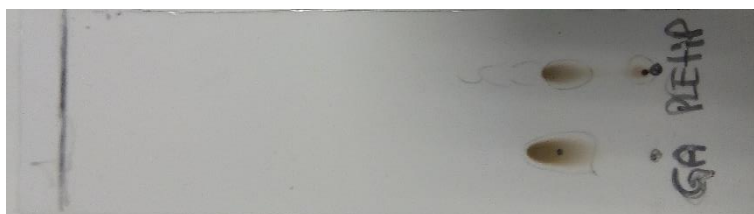

**Fig. S6.2** TLC of a sample of **10** versus GA

#### *Characterization data (m.p., FT-IR and NMR spectra peaks list and Elemental analysis results) of 10c*

**10c**. Withe crystals, m.p. 235-337°C [lit. [3] m.p. GA (ethanol): 238-240°C]. FTIR (KBr, cm<sup>-1</sup>): 3400, 1689. <sup>1</sup>H NMR (300 MHz, CDCl<sub>3</sub>) δ (ppm): 7.29 (s, 2H). <sup>13</sup>C NMR (75 MHz, CDCl<sub>3</sub>) δ (ppm): 172.01, 148.49, 144.07, 121.07, 116.12. Found: C, 49.15; H 3.89. C<sub>7</sub>H<sub>6</sub>O<sub>5</sub> requires C, 49.41; H, 3.56%.

Copies of NMR spectra of **10c** versus those ones of commercial GA (Fig. S6.3)

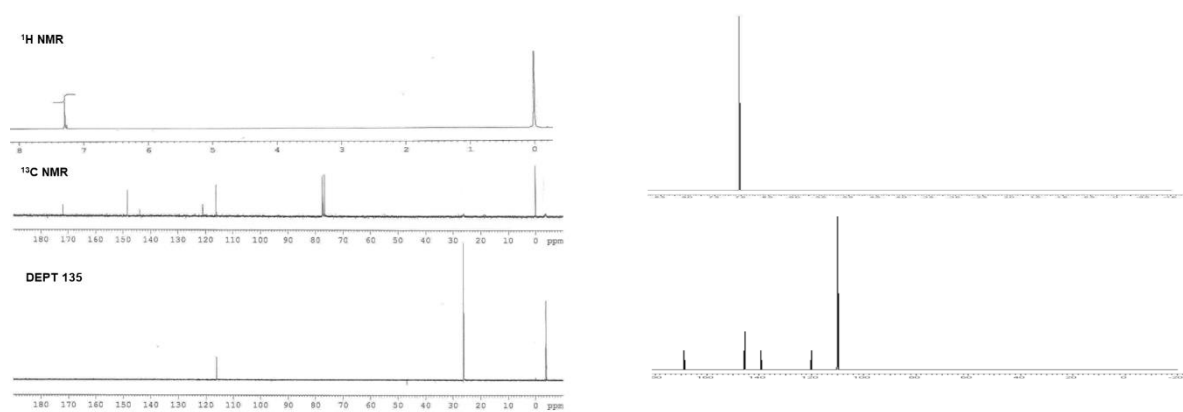

**Fig. S6.3** NMR spectra of the sample recrystallized (left) and of a sample of commercial GA (right)

## Section 7

Copies of FT-IR and NMR spectra of compounds 3-9 (Fig. S7.1-S7.21)

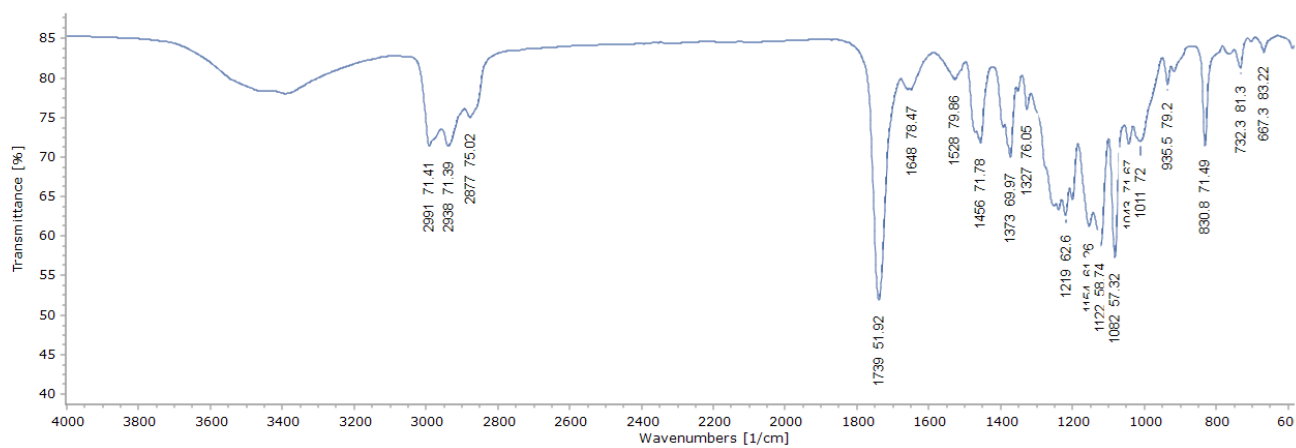

**Fig. S7.1** FT-IR spectrum (KBr) of dendrimer **3**

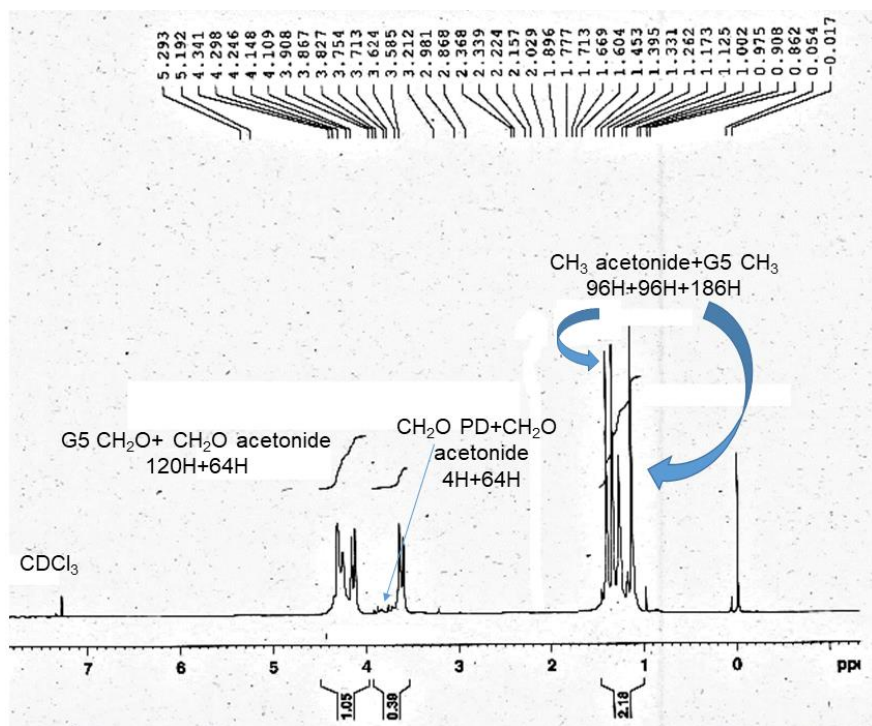

Fig. S7.2 <sup>1</sup>H NMR spectrum (CDCl<sub>3</sub>, 300 MHz) of dendrimer 3

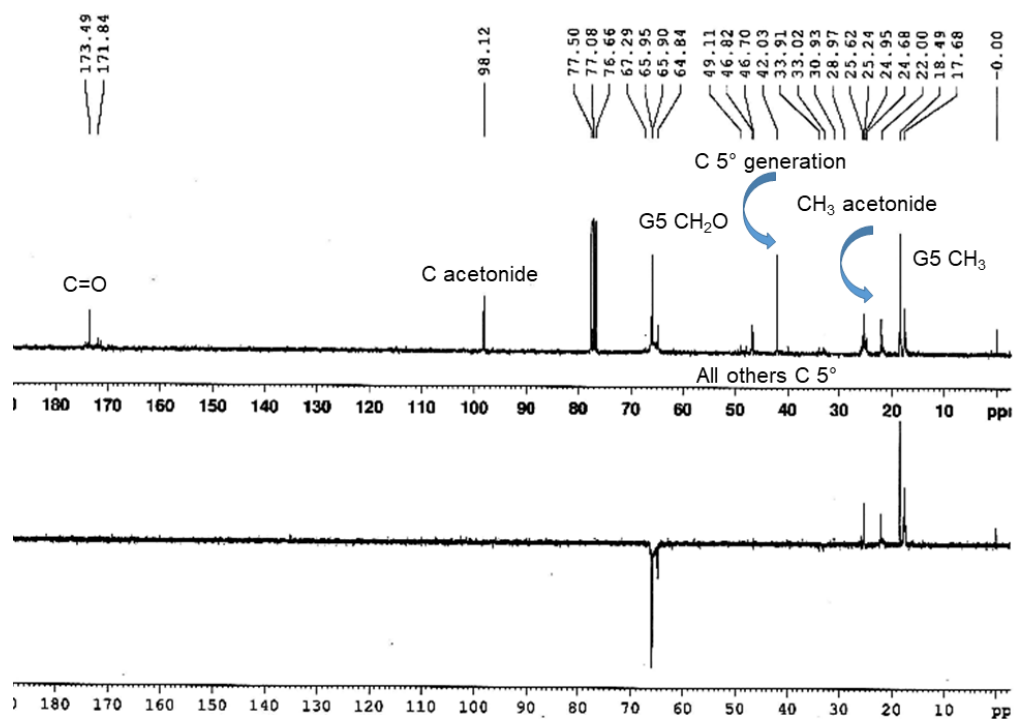

Fig. S7.3 <sup>13</sup>C NMR and DEPT-135 spectra (CDCl<sub>3</sub>, 75.5 MHz) of dendrimer 3

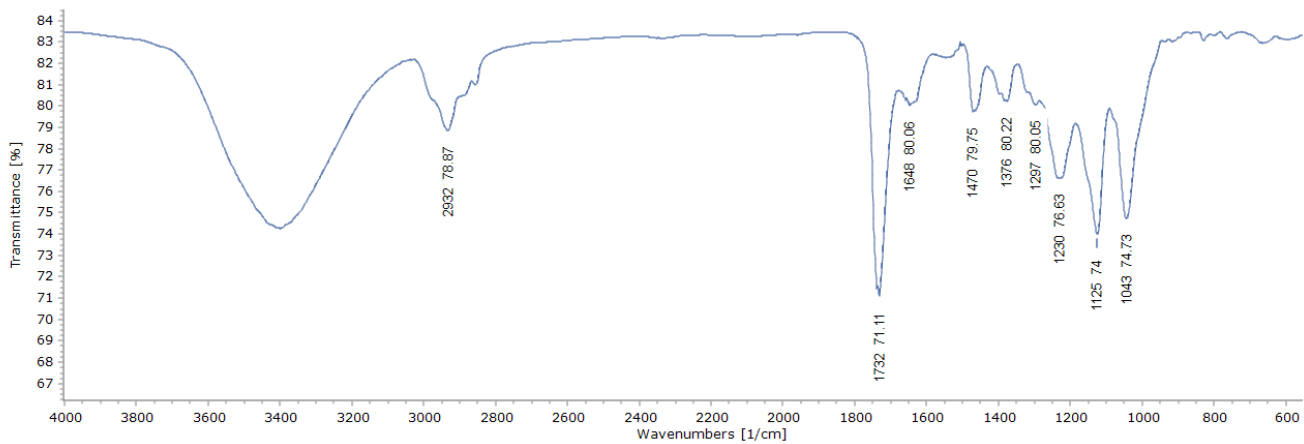

Fig. S7.4 FT-IR spectrum (KBr) of dendrimer 4

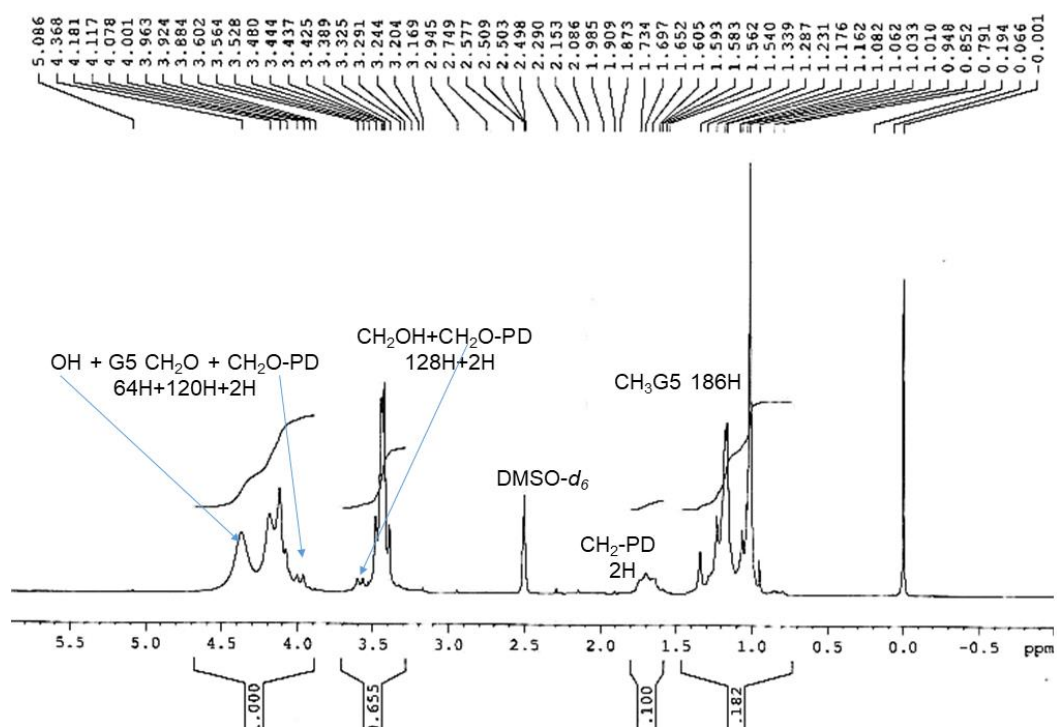

Fig. S7.5  $^1\text{H}$  NMR spectrum ( $\text{DMSO-}d_6$ , 300 MHz) of dendrimer 4

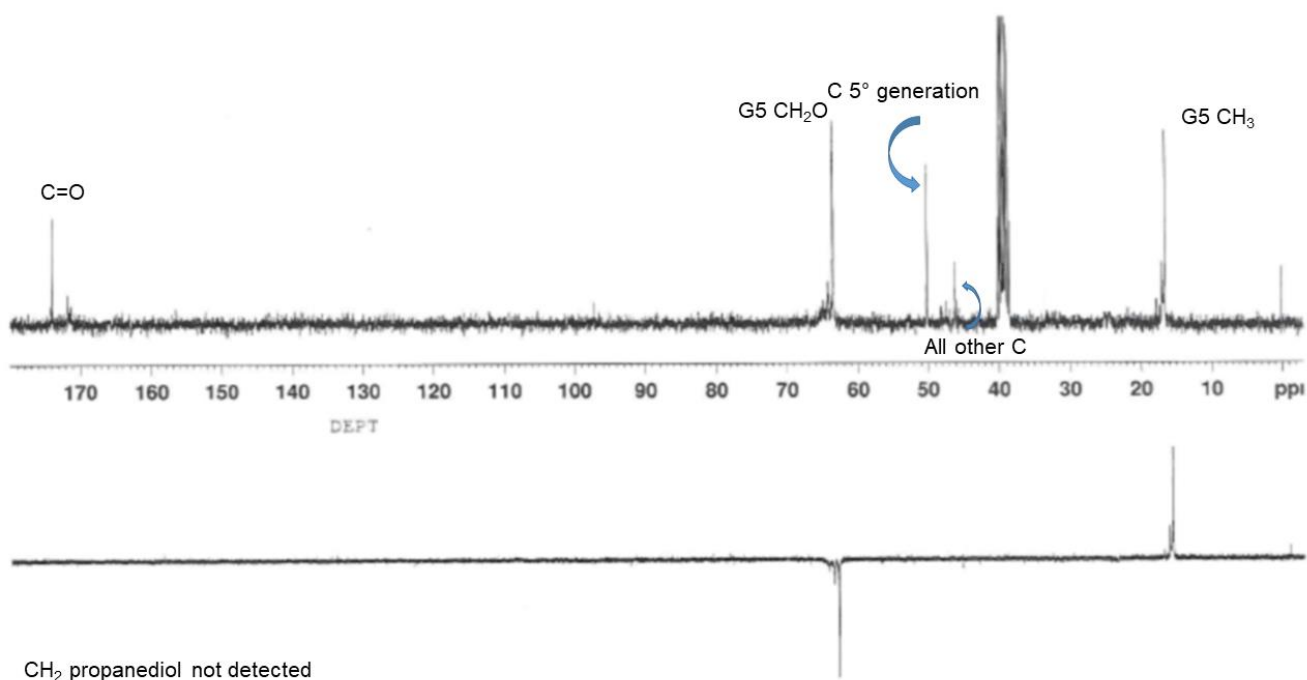

**Fig. S7.6** <sup>13</sup>C NMR and DEPT-135 spectra (DMSO-*d*<sub>6</sub>, 75.5 MHz) of dendrimer **4**

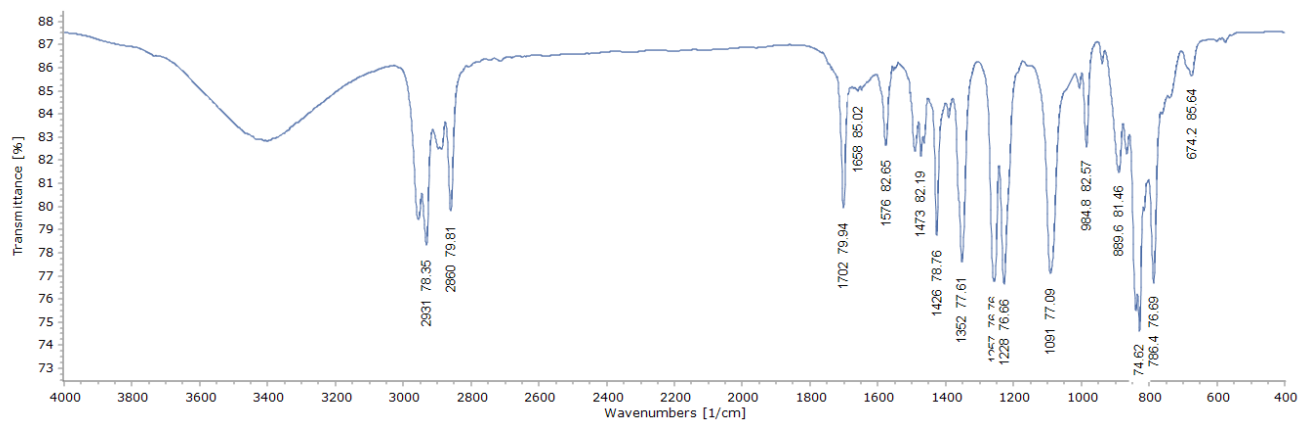

**Fig. S7.7** FT-IR spectrum (KBr) of compound **5**

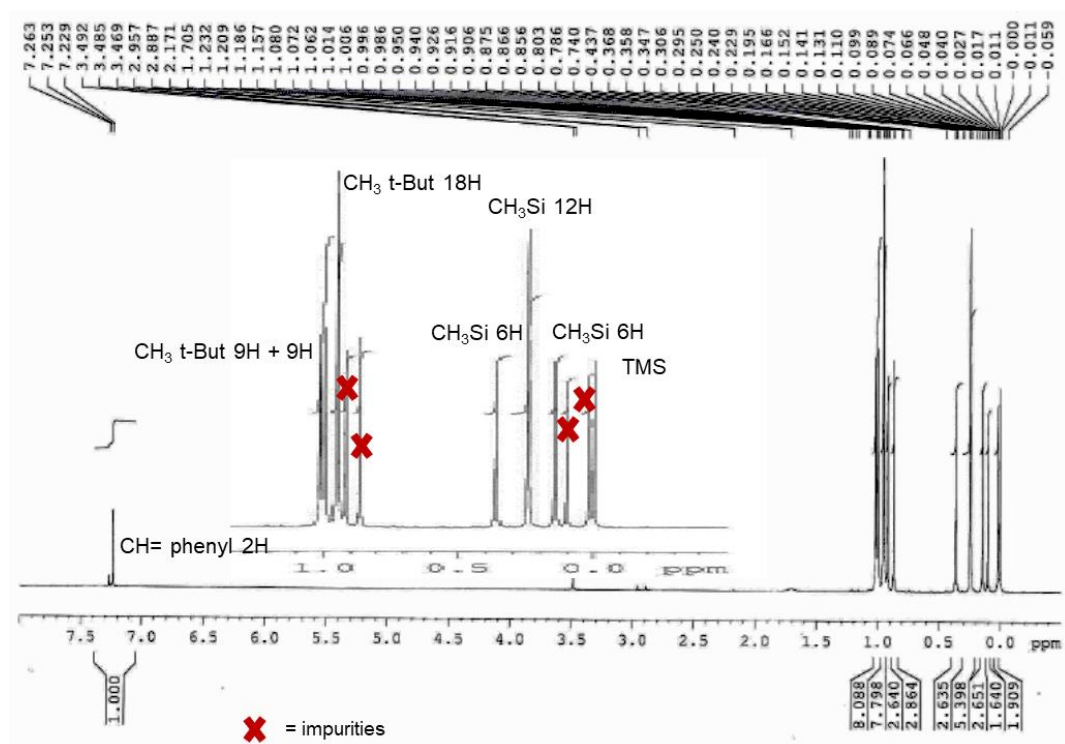

**Fig. S7.8**  $^1\text{H}$  NMR spectrum ( $\text{CDCl}_3$ , 300 MHz) of compound **5**

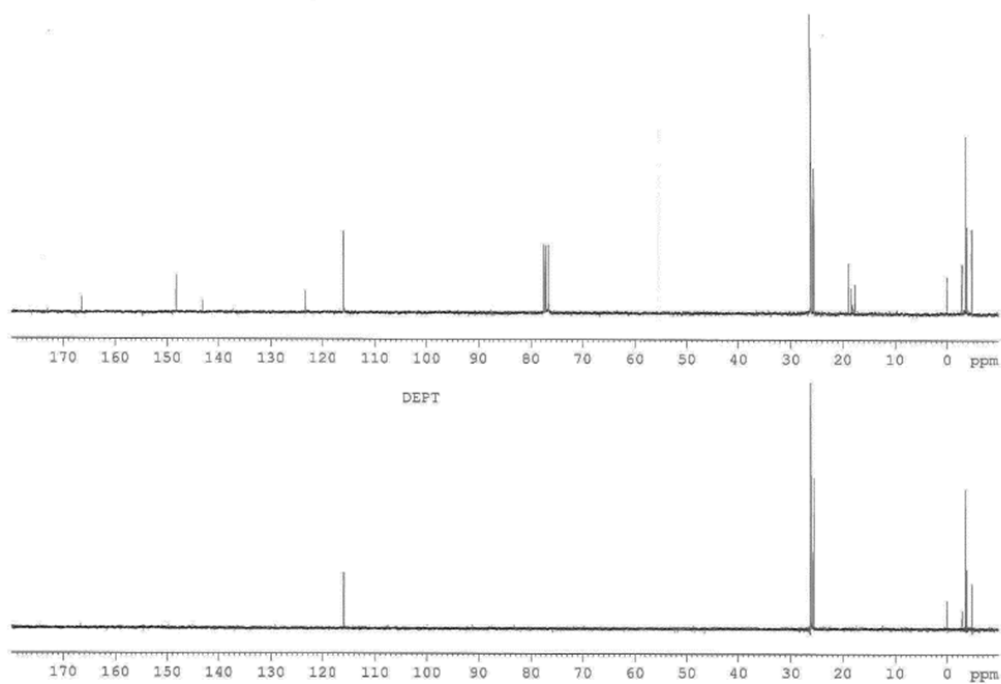

**Fig. S7.9**  $^{13}\text{C}$  NMR and DEPT-135 spectra ( $\text{CDCl}_3$ , 75.5 MHz) of compound **5**

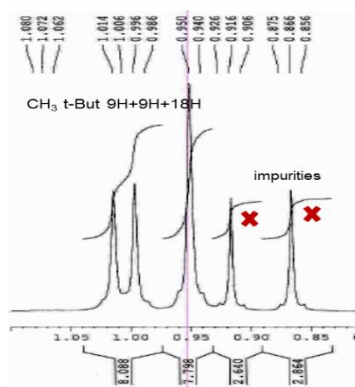

**Fig. S7.10** Expansion of a significant part of  $^1\text{H}$  NMR spectrum ( $\text{CDCl}_3$ , 300 MHz) of compound **5**

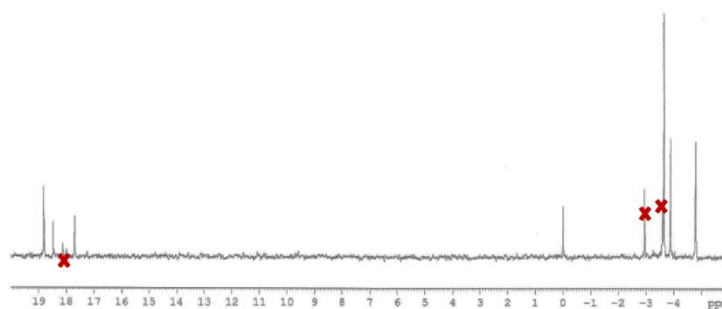

**Fig. S7.11** Expansion of a significant part of  $^{13}\text{C}$  NMR spectrum ( $\text{CDCl}_3$ , 75.5 MHz) of compound **5**

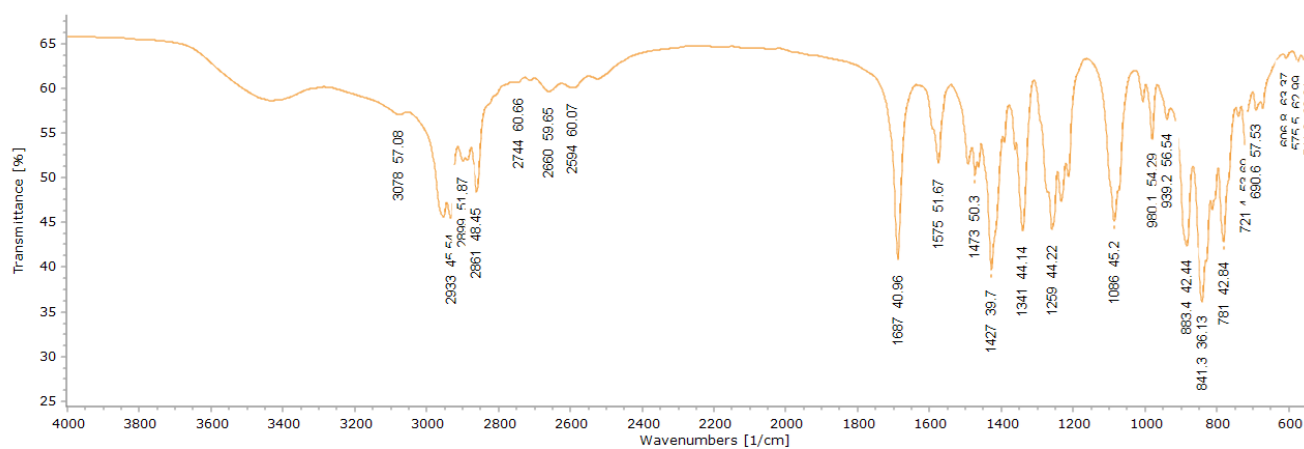

**Fig. S7.12** FT-IR spectrum (KBr) of compound **6**

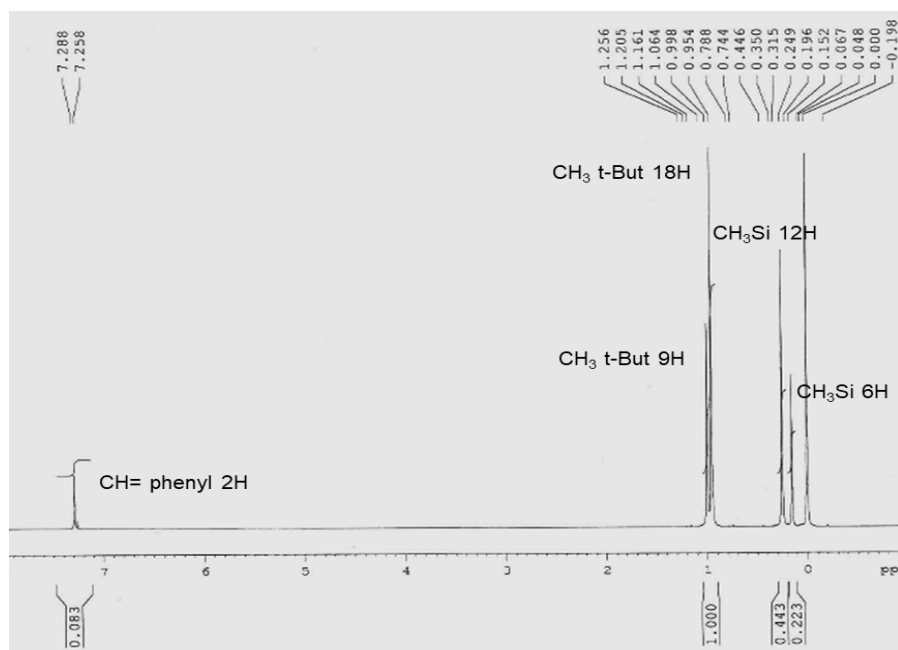

**Fig. S7.13**  $^1\text{H}$  NMR spectrum ( $\text{CDCl}_3$ , 300 MHz) of compound **6**



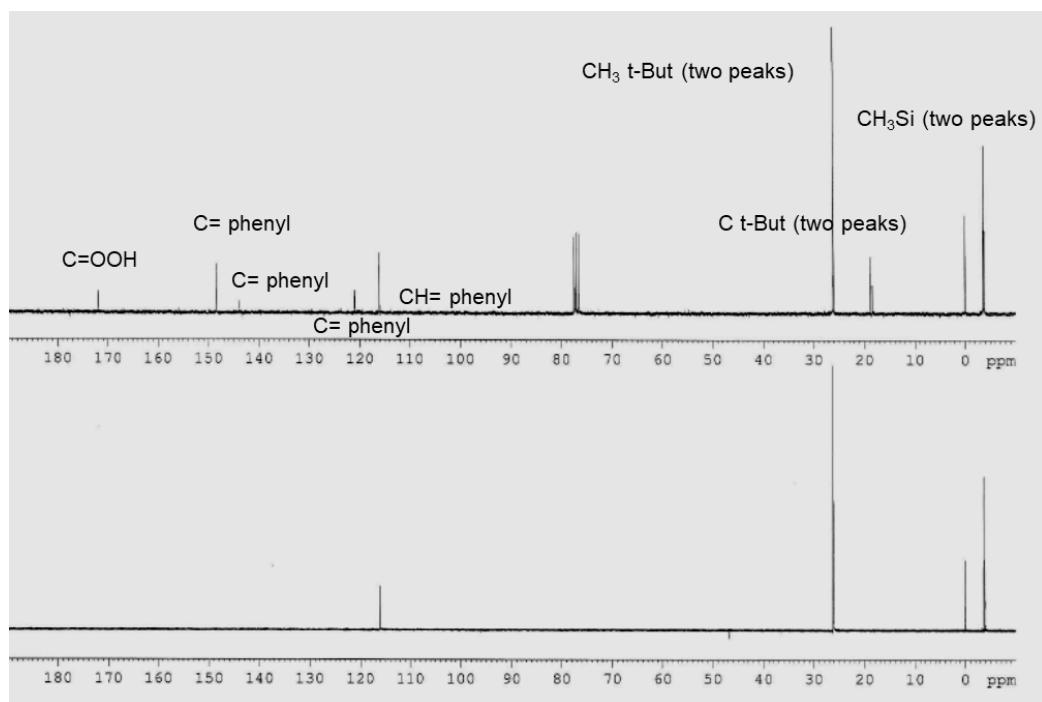

**Fig. S7.14**  $^{13}\text{C}$  NMR and DEPT-135 spectra (CDCl<sub>3</sub>, 75.5 MHz) of compound **6**

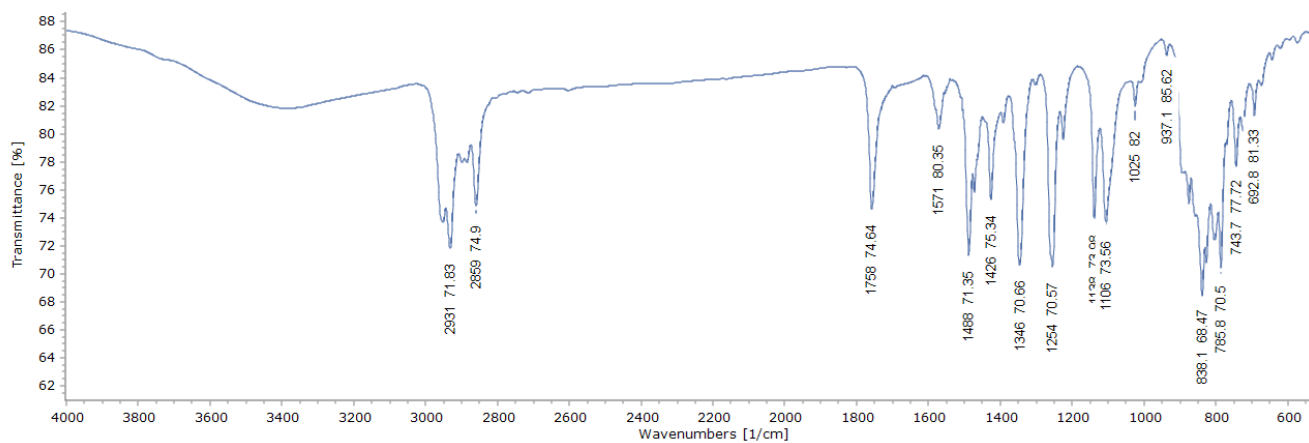

**Fig. S7.15** FT-IR spectrum (KBr) of compound **7**

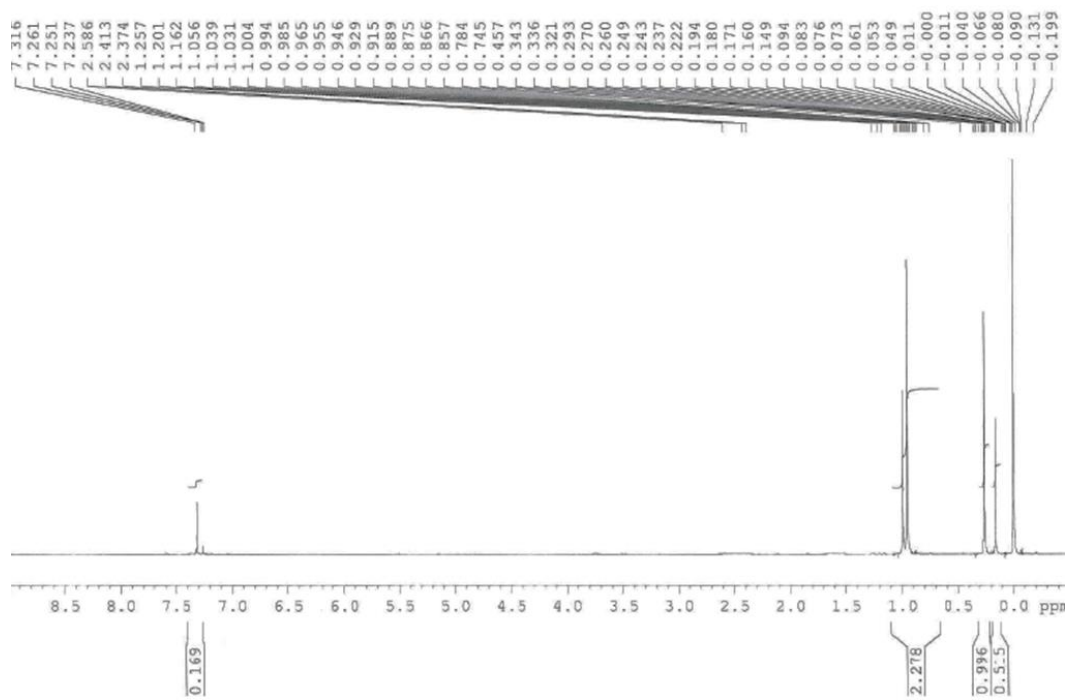

Fig. S7.16  $^1\text{H}$  NMR spectrum ( $\text{CDCl}_3$ , 300 MHz) of compound **7**

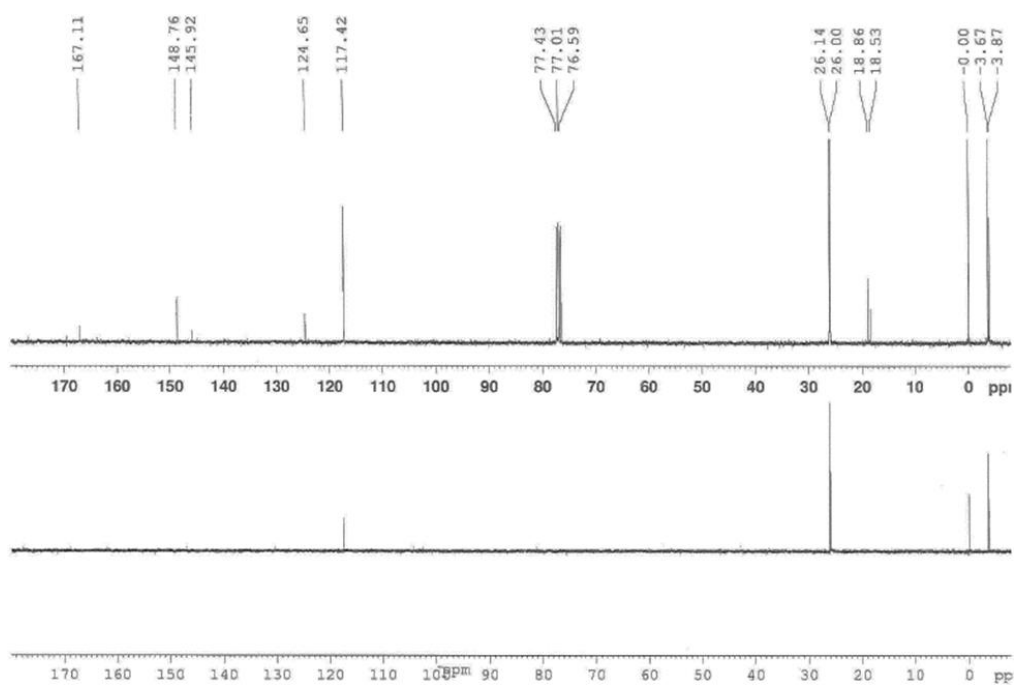

Fig. S7.17  $^{13}\text{C}$  NMR and DEPT-135 spectra ( $\text{CDCl}_3$ , 75.5 MHz) of compound **7**

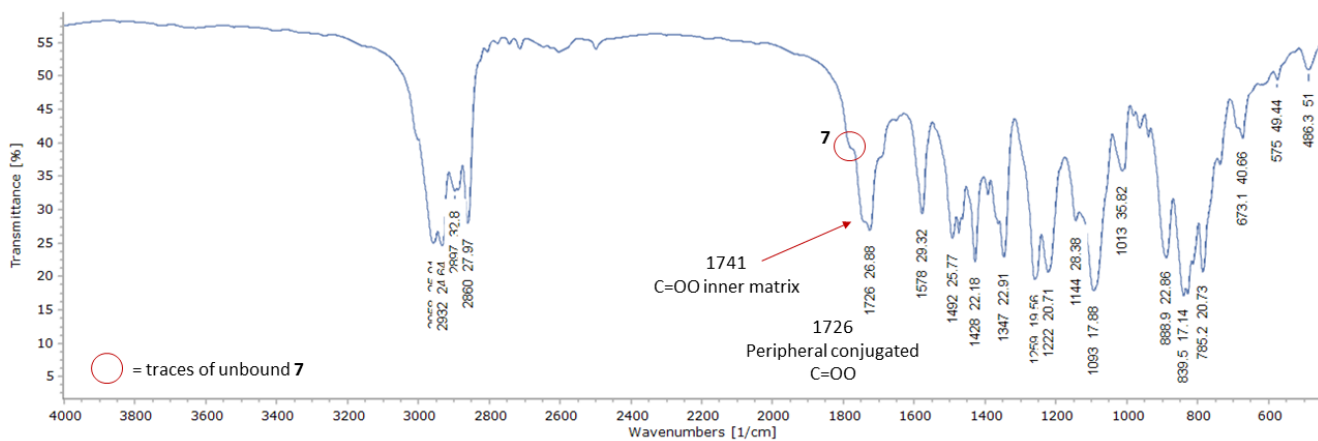

Fig. S7.18 FT-IR spectrum (KBr) of TBDMS-GA-dendrimer 8

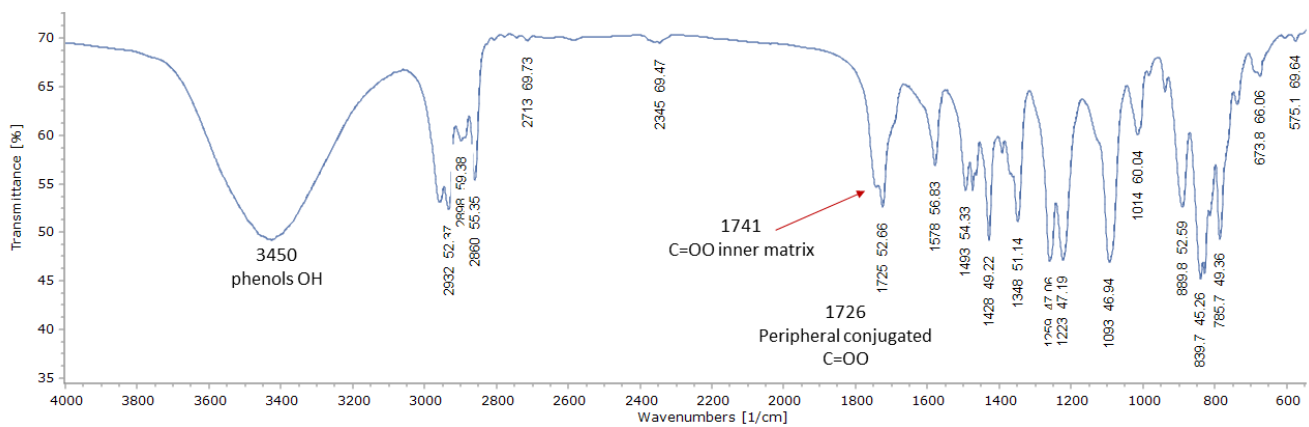

Fig. S7.19 FT-IR spectrum (KBr) of 192OH-GA-dendrimer 9

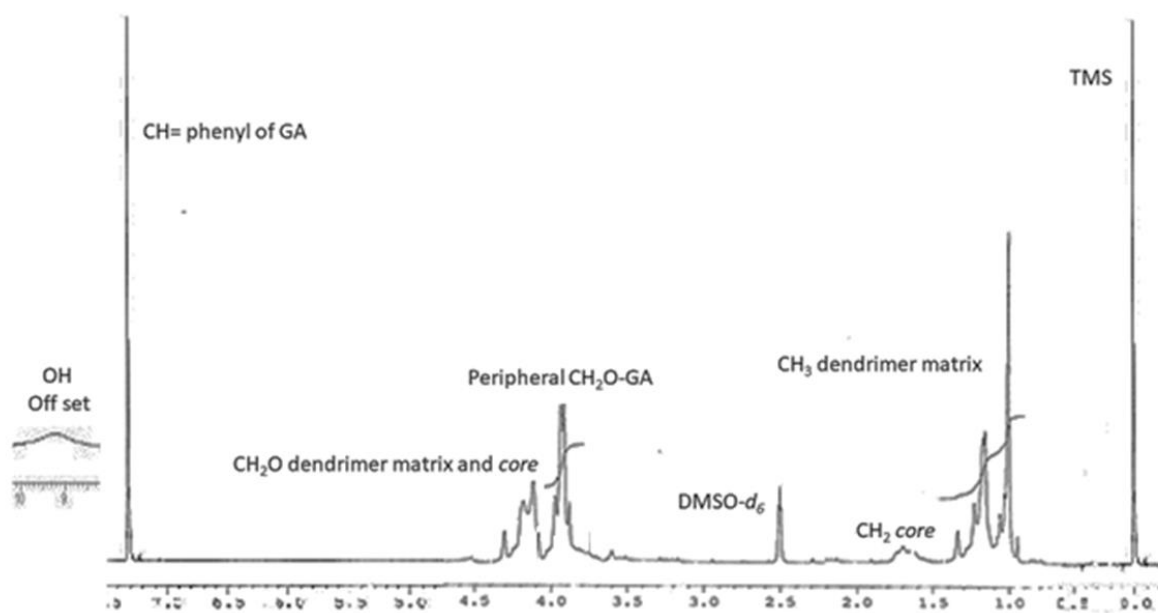

Fig. S7.20 <sup>1</sup>H NMR spectrum (DMSO-*d*<sub>6</sub>, 300 MHz) of dendrimer 9

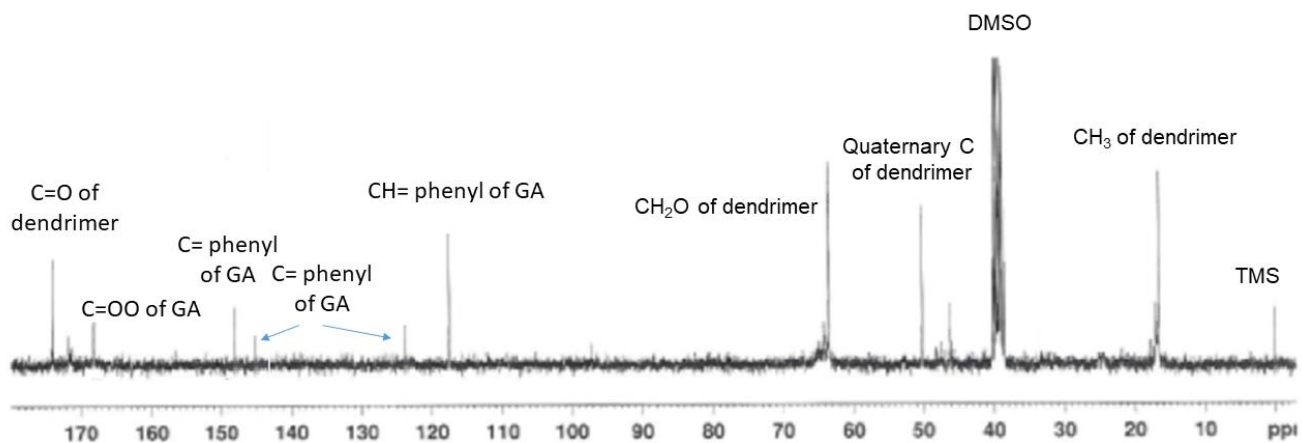

**Fig. S7.21**  $^{13}\text{C}$  NMR and DEPT-135 spectra ( $\text{DMSO-}d_6$ , 75.5 MHz) of compound **9**

### References

1. Malik G, Natangelo A, Charris J, Pouysegue L, Manfredini S, Cavagnat D, Buffeteau T, Deffieux D, Quideau S. *Chem Eur J.* 2012; 18: 9063.
2. Mohamada H, Abasa F, Permana D, Lajisa NH, Alib AM, Sukaric MA, Hin TYY, Kikuzaki H, Nakatani N. (Zingiberaceae). *Zeitschrift fur Naturforschung.* 2004; 59: 811.
3. Olennikov DN. *Chem Nat Comp.* 2005; 41: 222.
